# Supplementary material for: Exosomal STIMATE derived from type II alveolar epithelial cells controls metabolic reprogramming of tissue-resident alveolar macrophages
Source: PubMed Central journal article supplement (PMC9925314; doi:10.7150/thno.82552), 2023-01-22
Supplement: thnov13p0991s1.pdf [file thnov13p0991s1.pdf]

## **Supplementary Materials and Methods**

### **processing of human samples**

100 ml of 0.9% sodium chloride aqueous solution was used to lavage the subjects' trachea and lower lung BALF through a bronchial microscope. After centrifugation at 1500 g for 5 min, the supernatant sample was used in an ELISA experiment to evaluate the content of STIMATE<sup>+</sup> exosomes in the lung. The obtained cell pellet was washed with 0.9% sodium chloride and centrifuged under the same conditions. The pellet was reselected in PBS containing 1% BSA and passed through a 20 µm cell sieve (Millipore, MA, USA) to obtain a single-cell suspension. The sample was loaded into the flow cytometer to detect the TRAMs in the alveoli. The ABL90 blood gas analyzer (Radiometer, Brønshøj, Denmark) was used to detect the oxygenation index PaO<sub>2</sub>/FiO<sub>2</sub> in the whole peripheral blood of all subjects. The YH-830 medical ventilator (Yuwell, Shanghai, China) monitors the tidal volume, plateau pressure and PEEP of patients with PF to assess compliance with the respiratory system (Crs), Crs = tidal volume/(platform pressure-PEEP).

### **Animal experimental design**

During aging, the TRAMs in the lungs of WT mice were gradually replaced by BMDMs. Therefore, all types of lung injury mice in the experiment were performed in young and middle-aged mice from newborn to 24 weeks of age. The mice were inhaled anesthetized by mixing 100 mg/kg ketamine (Sigma–Aldrich Corp. St., Louis, MO, USA) and 10 mg/kg xylazine (Sigma–Aldrich Corp. St., Louis, MO, USA) in a ratio of 1:1. 1 µl microinjector was used to intraperitoneal injection bleomycin (0.125 U/kg, Sigma–Aldrich, MO, USA). At the specified time point, the mice were euthanized by intraperitoneal injection of a 3-fold overdose of sodium pentobarbital (Aibei, Nanjing, China), and lung tissue, peripheral blood and BALF were collected for assessment of injury and fibrosis. For the pathological assessment of lung tissue injury, tracheal intubation was quickly performed after over injection of pentobarbital anesthesia, 1 ml 10% FPA was used for lung perfusion and internal fixation, the complete lung tissue was quickly removed and then external fixation was performed with 10% FPA for 48 h, Standard paraffin embedding and tissue section (4 µm) (Leica Biosystems, Wetzlar, Germany), H&E staining (Beyotime Shanghai, China), and then tissue damage and inflammation assessment. The pathological evaluation was independently performed by three experienced pathology clinicians, and the slices were scored as mild inflammation and injury (0-4), mild (5-8), moderate (9-12), or severe (13) -15). The FlexiVent pulmonary system (SCIREQ Inc. Montreal, Canada) was used to evaluate mouse respiratory system compliance (Crs) to observe the lung ventilation function of pulmonary fibrosis mice. For the detection of blood oxygen index, after an over injection of pentobarbital

anesthesia, 200  $\mu$ l of blood was collected by intracardiac puncture, and the blood gas analyzer was used for detection within 30 min. After over injection of pentobarbital anesthesia, the mouse lungs were taken out, mixed with potassium hydroxide alkaline aqueous solution and boiled, adjusted to pH 6.5 with dilute hydrochloric acid, 4000 g, centrifuged for 10 min, and then used the hydroxyproline detection kit (Abcam, Cambridge, UK) to assess collagen deposition in the lungs of mice. For BALF STIMATE<sup>+</sup> ADE content and M1-like/M2-like TRAM ratio detection, the trachea was washed 3 times with 1.5 ml sterile saline, and the samples were combined and centrifuged at 1500 g for 5 min. The supernatant was collected and used for ADE extraction and ELISA detection. The cell pellet was collected and passed through a 20  $\mu$ M cell sieve (HyClone Laboratories, Logan, UT, USA) for flow cytometry.

#### **Single-cell suspension preparation procedure**

In short, mice were anesthetized by over injection of pentobarbital and perfused into the heart with 20 ml heparin (12500 U/ml, Aladdin, Shanghai, CHINA) in PBS. After opening the trachea, 1 ml of 1% low melting point agarose (Yeasen Biotechnology, Shanghai, CHINA) was injected at 42°C to fill the lungs. Carefully remove the entire lung tissue. Ophthalmic scissors divide the mouse lung into tissue fragments smaller than 1 mm<sup>3</sup> and place them in 10 ml Digest the homogenate [(containing 2 mg/ml collagenase A (Roche, Mannheim, GER) and 1XDNase I (Sigma–Aldrich, MO, USA)] in Dulbecco's modified Eagle medium (DMEM, HyClone, UT, USA) for 30 min, Shake at 37°C. Two milliliters of fetal bovine serum (HyClone, UT, USA) was used to terminate the digestion. A microsyringe was used to pass the homogenate through a 70-, 40- and 20- $\mu$ m nylon mesh filter membrane (Millipore, MA, USA). After centrifugation at 2000 g and 4°C for 5 min, the cell pellet was resuspended in PBS containing 1% BSA.

#### **Confocal laser scanning microscopy (CLSM) and total internal reflection fluorescence microscopy (TIRF)**

TRAMs or AEC-IIs were previously seeded on 35 mm glass-bottom culture dishes (MatTek, MA, USA) at very low density and grown overnight at 37 °C and 5% CO<sub>2</sub> using 10 mM HEPES, 100  $\mu$ g ml<sup>-1</sup> DMEM (HyClone, UT, USA) with penicillin, 100  $\mu$ g ml<sup>-1</sup> streptomycin and 10% heat-inactivated fetal bovine serum (Exosome free, Gibco, CA, USA) to clean nonadherent cells. After adding STIMATE<sup>+</sup>-ADEs or using thapsigargin (Abcam, MA, USA)) to induce storage depletion or rmGM-CSF (Gibco, CA, USA) stimulation, CLSM and TIRF imaging were performed according to the experimental requirements. TIRF images were obtained on a NIKON Eclipse Ti-E microscope (Tokyo, Japan), and CLSM were

obtained on a Leica STELLARIS DIVE confocal system (Wetzlar, Germany). A 488 nm laser was used to excite GFP, a 561 nm laser was used to excite mCherry, and a 400 nm laser was used to excite DAPI or the excitation wavelength indicated in the instructions of the corresponding fluorescently labeled antibody. For the observation of AEC-IIs, exosome release and the thapsigargin-excited store-operated  $\text{Ca}^{2+}$  entry (SOCE) experiment of TRAMs, 100 nm fluorescent beads (TetraSpecK microspheres, Life TeChinaologies, MD, USA) were deposited on a cover glass and imaged as a mark for later alignment. Image analysis was performed using NIS-Elements software (Nikon, Tokyo, Japan) or ImageJ (National Institutes of Health, MD, USA).

### **$\text{Ca}^{2+}$ measurement and imaging in TRAMs**

The intracellular  $\text{Ca}^{2+}$  measurement was performed with Fura-2 AM (MedChemExpress, NJ, CHINA) dye, and the intracellular  $\text{Ca}^{2+}$  concentration was measured by the ratio of the fluorescence intensity of the alternating excitation wavelengths of 340 nm and 380 nm, as described in our previous study<sup>[28]</sup>. In short, 24 h before imaging, WT or STIMATE<sup>-/-</sup> TRAMs were seeded on a 35 mm glass-bottom culture dish (MatTek, MA, USA) at a medium density. After preincubating TRAMs with different genetic backgrounds for 12 h, Fura-2 AM was loaded. Before imaging, TRAMs were stored in an imaging solution containing 1 mM  $\text{CaCl}_2$  and 2  $\mu\text{M}$  Fura-2 AM for 60 min. After that, the cells were cultured in  $\text{Ca}^{2+}$ -free standard DMEM (HyClone, UT, USA). For the determination of long-acting  $\text{Ca}^{2+}$  accumulation induced by GM-CSF, 10% exosome-free fetal bovine serum (Gibco, CA, USA) was used. Add 1  $\mu\text{M}$  thapsigargin, 100 ng/ml rm GM-CSF and 1.2 mM  $\text{CaCl}_2$  solution according to the time point of the experimental procedure. A single-frequency microscope filter set was used to alternately excite cells at 340 nm and 380 nm, and 409 nm single-frequency and 510/84 nm dichroic filters were used to monitor the emission wavelength. A Nikon inverted microscope (400 x oil immersion objective lens, NA = 1.4) (Tokyo, Japan) was used to enlarge the image, and an EMCCD camera was used to capture the image (EM gain was set to the linear dynamic range, the exposure time was 50 milliseconds, and images were acquired at 10-second intervals). For the thapsigargin-excited SOCE experiment, the area under the curve (AOC) with a fluorescence intensity ratio of 340 nm/380 nm between 200 and 400 s was taken as the calcium storage in the endoplasmic reticulum and the  $\text{Ca}^{2+}$  influx peak at 340 nm/380 nm after adding  $\text{CaCl}_2$  solution response capacity for SOCE. For the measurement of long-acting  $\text{Ca}^{2+}$  accumulation induced by GM-CSF, the area under the curve (AOC) with a fluorescence intensity ratio of 340 nm/380 nm from 0 to 250 s was taken as

the total accumulation value of the intracellular calcium response. All experiments were performed at room temperature.

### **Processing of extracellular vesicles**

In short, the obtained human BALF, mouse BALF or cell culture medium was centrifuged at 300 g for 5 min to remove exfoliated inflammatory cells or dead cells. Then, the supernatant was collected and centrifuged at 1,200 g for 10 min to remove cell debris to obtain a pretreated sample. Load 25 ml of pretreated sample supernatant to the top of an Amicon® Ultra-50 45 kDa Centrifugal Filter Unit (Merck, MA, USA), 75 min at 45000 g at 4 °C. Next, 3.5 ml of the PBS-eluted was transferred to a new Amicon® Ultra-14 35 kDa Centrifugal Filter Unit, diluted with 60 ml of PBS and centrifuged for 70 min at 45000 g at 4 °C. The purification and identification of exosomes require considerable time and the loss of many samples. For this reason, ELISA was used to quickly detect the relative concentration of CD63<sup>+</sup> exosomes or STIMATE<sup>+</sup> ADE in BALF or in cell culture media. To detect CD63 or STIMATE on exosomes, each well of an ELISA-embedded plate (96-well) (Abcam, MA, USA) was coated with 0.25 µg of anti-CD63 or STIMATE monoclonal antibody overnight at 4 °C. Two hundred microliters of blocking buffer (Pierce, IL, USA) was incubated for 1 h at room temperature to block free binding sites. Add 100 µl of the above-pretreated sample to each ELISA cell. After incubating overnight at 4 °C, a biotin-labeled monoclonal CD63 or STIMATE antibody was added and incubated at room temperature for 1 h. Then, 100 µl horseradish peroxidase-conjugated streptavidin (B & D Biosciences, NJ, USA) was added and incubated at room temperature for 1 h. Tetramethylbenzidine (Pierce, IL, USA) was used as a color developer, and 0.5 N H<sub>2</sub>SO<sub>4</sub> was used to stop the reaction. A BioTek microplate reader (Vermont, USA) was used to read the absorbance value of the ELISA plate at an emission wavelength of 450 nm. Recombinant human CD63 or STIMATE protein (Gibco, CA, USA) was used to generate a standard curve. Recombinant P-selectin protein (Gibco, CA, USA) was used as a negative control to verify the specificity of the test.

### **OCR and ECAR analysis**

A Seahorse XFe96 Cell Metabolic Respiratory Dynamics Analyzer (Seahorse Bioscience, Inc., North Billerica, MA) was used to measure the oxygen consumption rate (OCR) and extracellular acidification rate (ECAR) of TRAMs. The cells were cultured in a 96-well plate containing 10 mM glucose, 1 mM GlutaMAX (Sigma–Aldrich, MO, USA) and 1 mM sodium pyruvate in XF medium (Agilent Technologies, CA, USA). The following drugs were added according to the program settings: ATP

synthase inhibitor oligomycin (1  $\mu\text{M}$ ); proton carbonyl cyanide-4-(trifluoromethoxy)phenylhydrazone (FCCP) (0.75  $\mu\text{M}$ ) uncoupling mitochondria; mitochondrial complex I inhibitor rotenone (100 nM) + mitochondrial complex III inhibitor antimycin A (1  $\mu\text{M}$ ) (all inhibitors were obtained from Agilent Technologies, CA, USA). The basal oxygen consumption rate (OCR) was calculated by subtracting the OCR after rotenone and antimycin A treatment from the OCR before oligomycin treatment. The maximum OCR was calculated by subtracting the OCR after rotenone and antimycin A treatment from the OCR measured after adding FCCP. The measurements before any reagents are introduced are baseline OCR and ECAR. Oligomycin is a compound V inhibitor that blocks the production of ATP, and the measurement after addition is the OCR and ECAR related to ATP production. Adding FCCP to destroy the inner mitochondrial membrane gradient was measured as the maximum OCR and ECAR of the cell. Antimycin A and rotenone were added to turn off ETC complex activity to measure the OCR and ECAR from nonmitochondria.

### **Aerosol inhalation quantify**

The total protein concentration of exosomes isolated from the BALF of healthy mice was  $11.2 \pm 4.17$   $\mu\text{g/ml}$ , as quantified by the BCA method. The concentration of STIMATE protein in exosomes isolated from the BALF of healthy mice was  $2.2 \pm 1.2$  ng/ml, as detected by EV-based ELISA. The number of BALF exosomes in healthy mice was  $1.23 \times 10^8 \pm 3.3 \times 10^6/\text{ml}$ , as assessed by NTA. We obtained 1-1.5 ml BALF from each mouse by lavage with PBS. Considering that the number of mouse lung particles will be diluted with PBS, it needs to reach  $10^9$  to  $10^{10}$  particles; that is, 27-270 ng STIMATE<sup>+</sup>-ADE per mouse can restore physiological STIMATE<sup>+</sup>-ADE concentrations in injured mice. A total of  $4 \times 10^6$  primary AEC-II<sub>s</sub> (primary cultures from 6 mice) secreted approximately 2-3 ng STIMATE<sup>+</sup>-ADE 24 h after mtDNA transfection, thus severely limiting the therapeutic application of STIMATE. MLE-12 cells ( $2 \times 10^7$ ) can obtain approximately 2-3 ng of STIMATE<sup>+</sup>-ADE within 24 h of mtDNA transfection, whereas rmSP-A/mtDNA agarose particle induction (low temperature and hypoxia) can harvest approximately 30-75 ng. Therefore, for each mouse inhalation treatment,  $8 \times 10^7$  MLE-12 cells (approximately 3 filled 75 ml cell culture flasks) were cocultured with 8  $\mu\text{M}$  rmSP-A/mtDNA agarose pellets for 24 h.

### **Glucose utilization and glucose uptake measurement**

The fluorescent glucose analog 2-NBDG (Abcam, MA, USA) was used to indirectly analyze the glucose uptake ability of TRAMs, according to the product specification. In short, TRAMs were cultured in

glucose-free RPMI 1640 medium 6 h before the experiment, and 100 ng/ml rm GM-CSF was added to induce proliferation after preincubating TRAMs with STIMATE<sup>+</sup> ADEs of different genetic backgrounds for 12 h. After 12 h, the specified concentration of 2-NBDG was added and incubated for 10 minutes. The cell culture supernatant was removed, and the cells were washed with cell-based assay buffer. At this time, propidium iodide was added to exclude dead cells if analyzed by flow cytometry. Cell detection buffer and immediately performed flow cytometry analysis. Flow cytometry and FlowJo software were used to detect the fluorescence intensity of TRAMs at wavelengths of 485/535 nm.

### **Flow Cytometry**

For the cell ratio of TRAMs and BMDMs and the detection of AEC-II, the pretreated BALF cell pellet was resuspended in PBS containing 0.1% BSA. Anti-Fc $\gamma$ RII/Fc $\gamma$ RIII (Alomone Laboratories, Jerusalem, Israel) was used for blocking for 5 min. Primary antibodies coupled with different fluorescence wavelengths were added according to the predetermined antibody dilution ratio and incubated for 30 min in the dark. For the immunocoupling of intracellular factors, Triton X-100 (Sigma–Aldrich, MO, USA) was used; after permeabilization, the primary antibody was added according to the product instructions. The stained cells were analyzed using a FACSVerse flow cytometer (BD Biosciences, NJ, USA) and FlowJo software (Version 10.7; TreeStar, OR, USA). The cell sorting strategy is shown in FIG. S8, and the commercialized antibody information is shown in Supplementary Table S1.

### **Western blot**

SDS–PAGE was performed on an equal amount of lysate under each condition, transferred to a nitrocellulose membrane, blocked with low-fat milk, and incubated with the specific WB primary antibody mixture overnight. The protein was visualized using HRP-conjugated anti-mouse secondary antibody (Sigma–Aldrich, MO, USA) and chemiluminescent ECL reagent (Thermo Fisher Scientific, MA, USA), and the optical density was quantified using ImageJ (National Institutes of Health, MD, USA).

### **Real-time fluorescent quantitative PCR**

TRIzol (Invitrogen, CA, USA) was used to isolate total RNA, and an iScript cDNA synthesis kit (Bio-Rad, CA, USA) was used to synthesize cDNA. Maxima SYBR Green qPCR Master Mix (Thermo Fisher, MA, USA) and gene-specific primers for quantitative real-time PCR. The relative abundance of transcripts was normalized to the expression of housekeeping genes using the 2- $\Delta$ CT method. The relative expression value was calculated by normalizing gene expression to the average value of untreated WT TRAMs.

## Supplementary Figure.

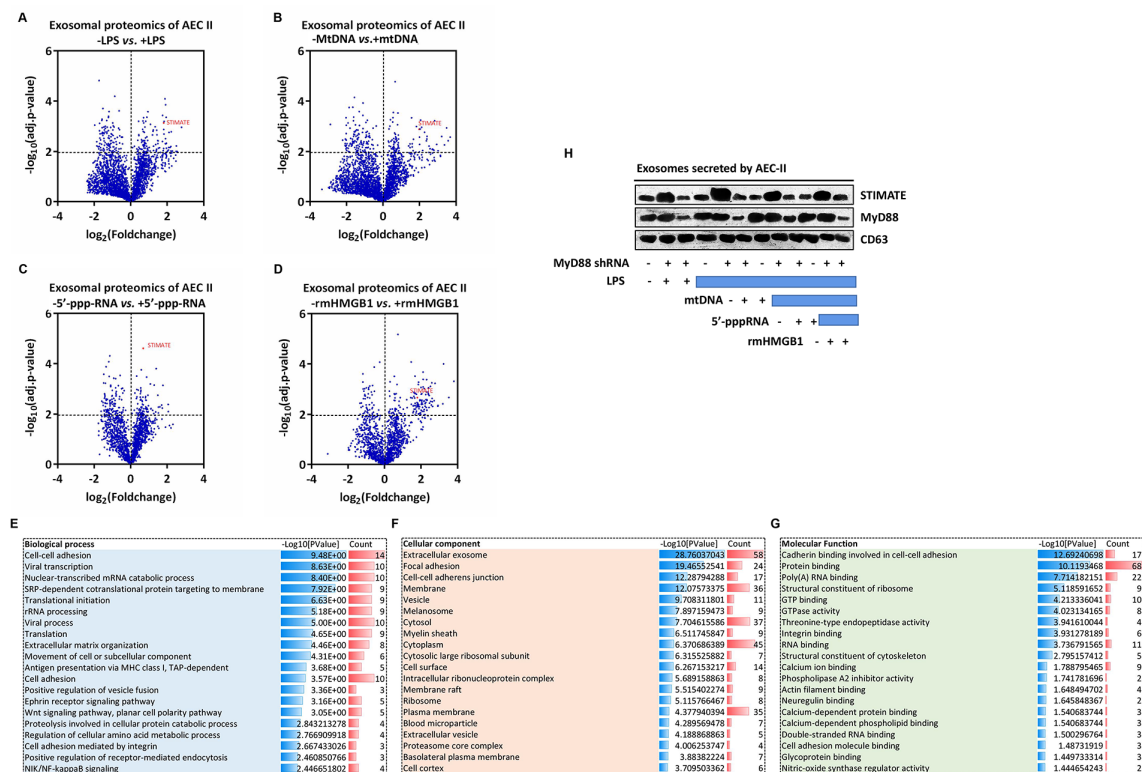

**Figure S1. Characterization of exosomal protein cargo.**

(A-D) Volcano map of differentially existing protein cargo in exosomes released by mouse AEC-IIs before and after stimulation by LPS and rmHMGB1 or transfection by mtDNA and 5'-pppRNA. Fold change > 1.5

or  $<0.5$  and  $p$  value  $<0.01$  were considered statistically significant, and upregulated proteins in the four panels were used for overlap analysis in the Venn diagram.

(E-F) GO analysis of the overlap of differentially existing protein cargos in exosomes, including biological processes, cellular components and molecular functions.

(G) Representative Western blotting image of STIMATE protein expression in exosomes released by mouse AEC-IIIs and myD88 shRNA-transfected AEC-IIIs after stimulation with LPS and rmHMGB1 or transfection with mtDNA and 5'-pppRNA.  $n=3$ . CD63 and represent Exo-specific markers.

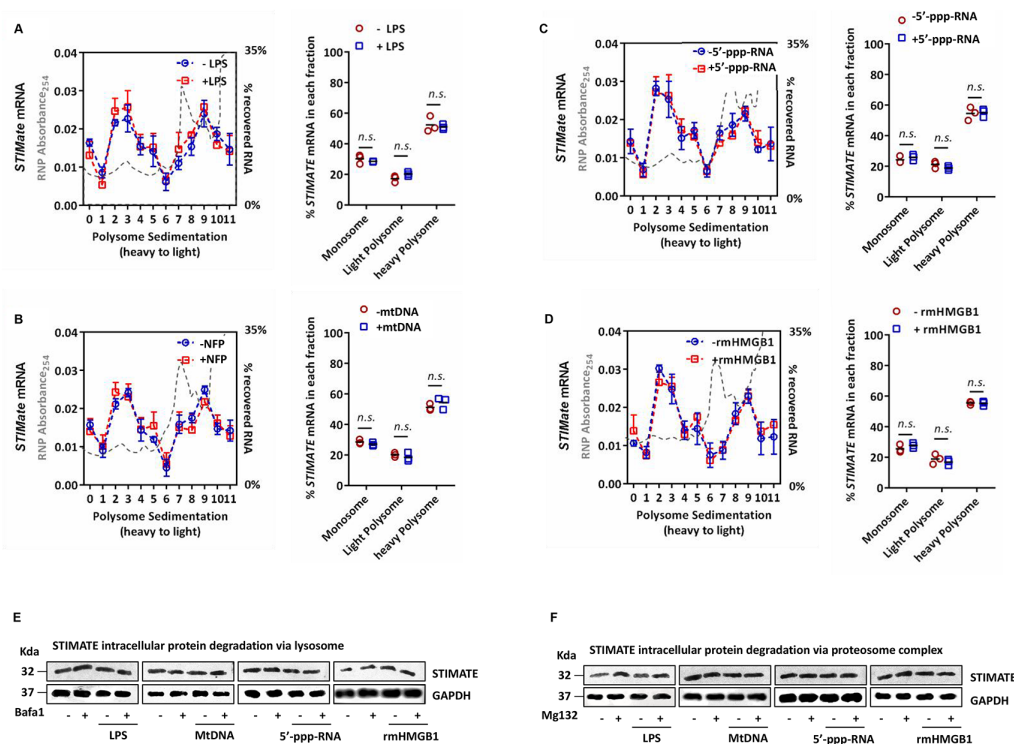

**Figure S2. The effect of differences in protein translation and degradation on STIMATE expression in AEC-IIIs.**

(A-D) Polysome profiles in LPS-, rmHMGB1-, mtDNA-, 5'-pppRNA-induced mouse AEC-IIIs and the composition of STIMATE mRNA across the monosome, low-polysome, and heavy-polysome fractions in AEC-IIIs. Separation of polysomes by sucrose density gradient centrifugation. The dashed gray line is the absorbance of ribosomes at 254 nm. The abscissa represents relatively heavy polyribosomes from left to right, single ribosomes (80S), ribosomal subunits (60S), 40S and mRNP single molecules (50% to 15% sucrose). The colored dotted line is the gene mRNA change detected by RT-PCR.

(E) A representative western blot of STIMATE in mouse AEC-IIIs induced by LPS-, rmHMGB1-, mtDNA-, or 5'-pppRNA in the presence or absence of the lysosome inhibitor BafA is shown.

(F) A representative western blot of STIMATE was performed in mouse AEC-IIIs induced by LPS, rmHMGB1, mtDNA, or 5'-pppRNA in the presence or absence of the proteasome inhibitor MG132.



Data are shown as the mean±SD, \*p<0.05 and \*\*p<0.01 by paired Student's t test compared to untreated AEC-II. The proteomics of exosomes comes from 2 independent experiments, and the polysome and western blot data come from 3 independent experiments.

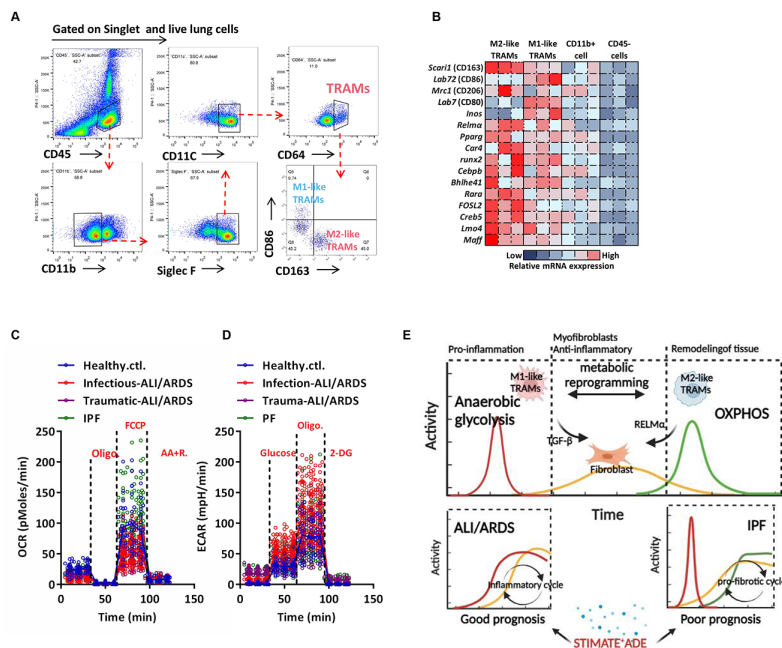

**Figure S3. Immune characteristics of M1-like TRAMs and M2-like TRAMs.**

(A) Flow cytometry sorting strategy for the collection of M1-like (CD86<sup>+</sup>) and M2-like (CD163<sup>+</sup>) TRAMs (CD45<sup>+</sup>CD11b<sup>+</sup>Siglec F<sup>+</sup>CD11d<sup>+</sup>CD64<sup>+</sup>) from patient BALF.

(B) Heatmap of AM-specific transcription factor gene expression from the BALF of two ALI/ARDS patients and one IPF patient in M1-like and M2-like TRAMs compared to CD45-nonimmune cells and CD11b<sup>+</sup> dendritic cells, showing log normalized values from minimum (blue) to maximum (red).

(C) Seahorse TRAM mitochondrial respiration monitoring in BALF of healthy subjects, infectious & traumatic ALI/ARDS and interstitial PF patients. OCR at baseline and after sequential treatment with oligomycin (Oligo), carbonyl cyanide 4-(trifluoromethoxy) phenylhydrazone (FCCP) and antimycin A & rotenone (AA+R).

(D) Seahorse TRAMs glycolysis capacity test in BALF of healthy subjects and patients. ECAR at baseline and after sequential treatment with oligomycin (Oligo) and 2-deoxy-D-glucose (2-Dg).

(E) Schematic diagram of lung homeostasis: Immunophenotypic selection and metabolic predisposition of TRAMs in early-stage inflammation (red curve), intermediate proliferation (yellow curve), and late-stage resolution/scar formation (green curve) aiming for lung tissue homeostasis.

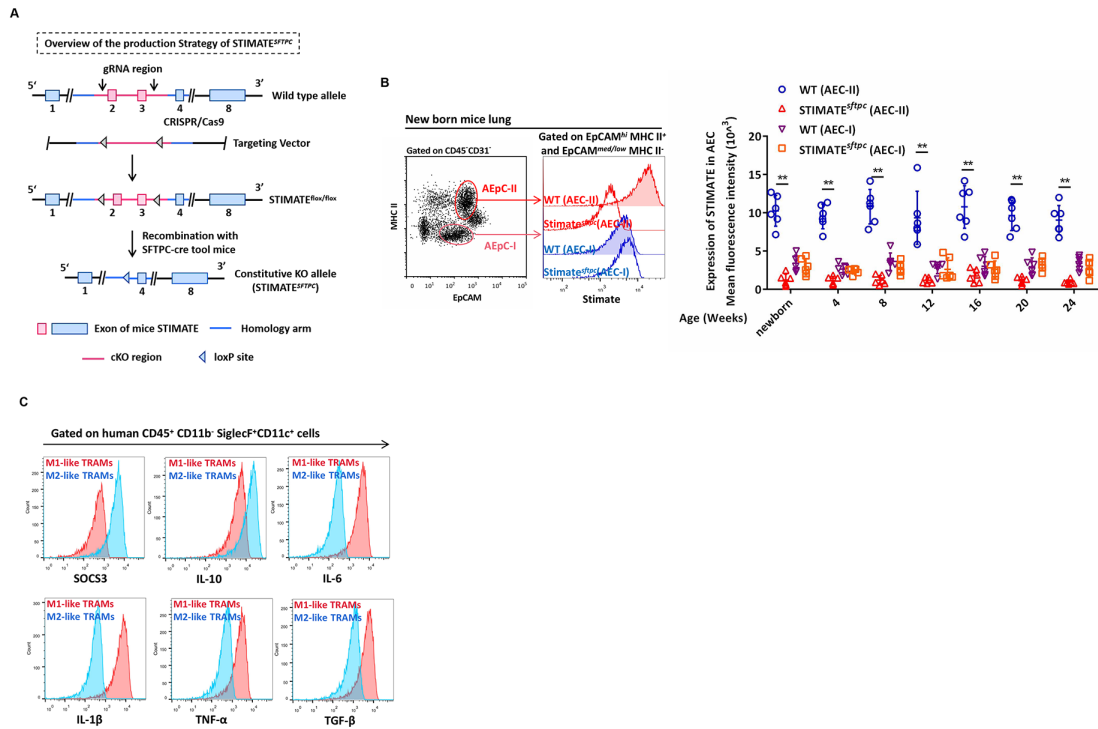

**Figure S4. *STIMATE<sup>sf1pc</sup>*-deficient mice.**

(A) The production and reproductive pattern of *STIMATE<sup>sf1pc</sup>*-deficient mice.

(B) Flow cytometry analysis of *STIMATE* expression in AEC-I and AEC-IIs of *STIMATE<sup>sf1pc</sup>* mice, the right plot data based on *STIMATE* knockout efficiency in AEC-I and AEC-IIs in multiple age groups,  $n = 6$ .

(C) Flow cytometric analysis showing the expression of the cytokines SOCS3, IL-10, IL-6, IL-1 $\beta$ , TNF- $\alpha$  and TGF- $\beta$  on M1-like human TRAMs (red) and M2-like human TRAMs (blue).

Data are shown as the mean $\pm$ SD, \* $p < 0.05$  and \*\* $p < 0.01$  by paired Student's t test compared to untreated AEC-IIs. The proteomics of exosomes comes from 2 independent experiments, and the polysome and western blot data come from 3 independent experiments.

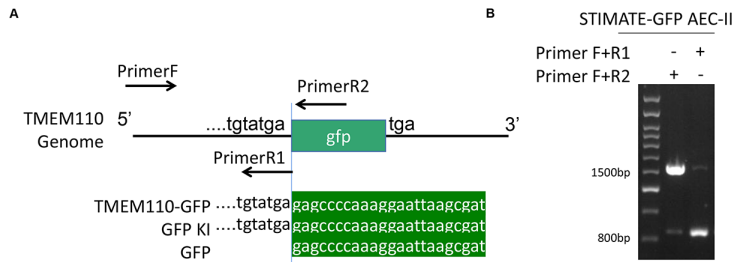

**Figure S5. Construction of STIMATE-gfp AEC-IIs.**

(A) Diagram of the inserted location of STIMATE-GFP knock-in (KI) mouse AEC-IIs and sequencing of the genome. (B) PCR analysis of STIMATE-GFP knock-in (KI) AEC-IIs.

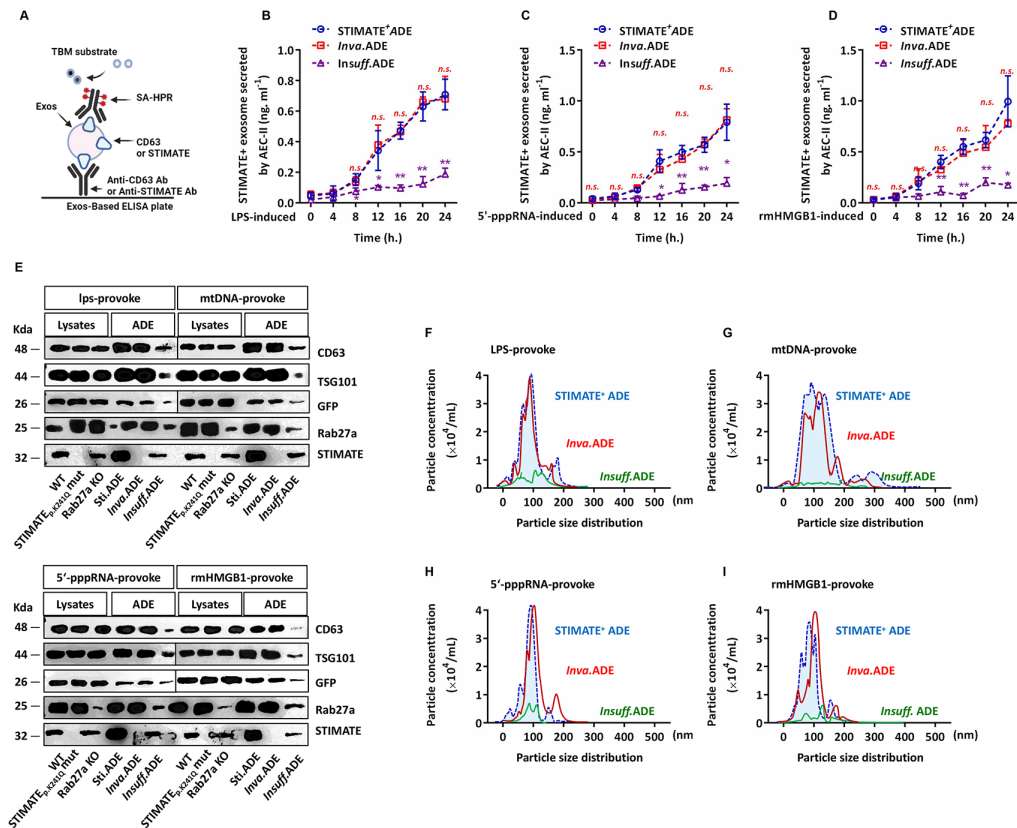

**Figure S6. Characteristics of ADE released by different genetic backgrounds of AEC-IIs and different provocative AEC-IIs.**

(A) Schematic diagram of exosomes-based ELISA for detecting exosomal CD63 or STIMATE. For more information, please refer to the methods.

(B-D) exosomes-based ELISA detects STIMATE<sup>+</sup>ADE, *Inva.*ADE and *Insuff.*ADE released by GFP-tagged STIMATE WT, STIMATE<sup>P. K241Q</sup> and Rab27a KO mouse AEC-IIs after transfection with 5'-pppRNA and stimulation with LPS and rmHMGB1 after 24 h, respectively. Draw according to the reorganized STIMATE standard curve.

(E) Representative Western blotting image of STIMATE and Rab27a protein expression in GFP-tagged STIMATE WT and STIMATE<sup>P cells. K241Q</sup> and Rab27a KO AEC-IIs lysates and exosomes after transfection with 5'-pppRNA and stimulation with LPS and rmHMGB1 after 24 h, respectively, n=3. CD63 and Tsg101 represent Exo-specific markers.

(F-I) The NanoSight nanoparticle tracking system characterizes the release of ultrafiltration centrifugation exosomes from GFP-tagged WT, STIMATE<sup>P. K241Q</sup> and Rab27a KO mouse AEC-IIs stimulated by LPS & rmHMGB1 and transfected by mtDNA & 5'-pppRNA, respectively.

Data are shown as the mean±SD, \*p < 0.05 and \*\*p < 0.01 by analysis of variance (ANOVA) followed by a post hoc test compared to resting TRAMs. All data were derived from 3 independent experiments.

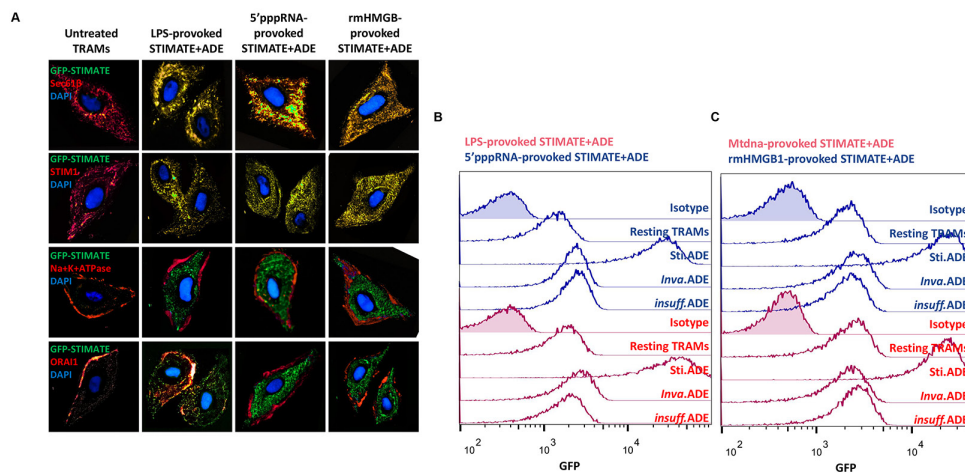

**Figure S7. Uptake of ADE by mouse TRAMs released by different genetic backgrounds of AEC-IIs and different provocative AEC-IIs.**

(A) Representative CLSM of mouse TRAMs after 12 h of cocultivation with lps, 5'-pppRNA and rmHMGB1 provoked STIMATE<sup>+</sup>ADE. The images from top to bottom sequentially show the merged GFP-STIMATE with anti-Sec61β, anti-STIM1, anti-Na<sup>+</sup>K<sup>+</sup> ATPase and anti-ORAI1. Scale bar: 2 μm.

(B-C) The fluorescence intensity of GFP in mouse TRAMs obtained from STIMATE<sup>+</sup>ADE that were released from different genetic backgrounds AEC-IIs and different provocative AEC-IIs was measured by flow cytometry.

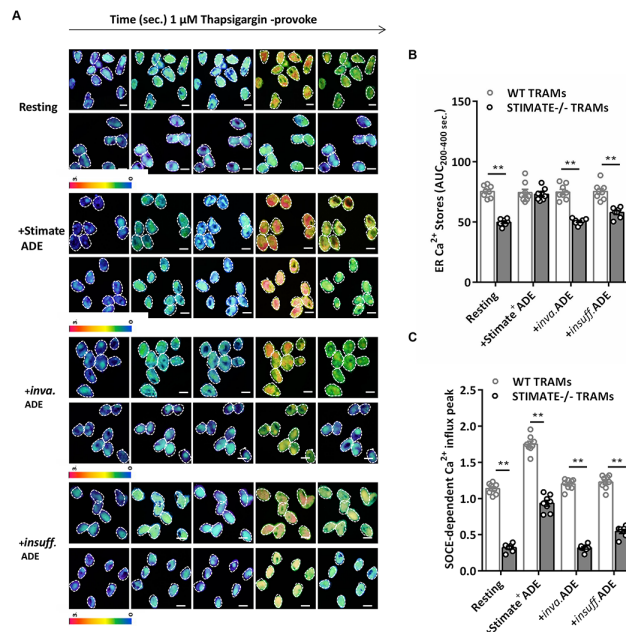

**Figure S8. Ca<sup>2+</sup> storage capacity assay**

(A) The representative image shows the fluorescence image of GFP-positive mouse TRAMs (defined by the dotted circle) loaded with Fura-2 AM in TRAMs at representative time points with STIMATE<sup>+</sup>-ADE, *Inva.*ADE and *Insuff.*ADE before 1 μM TG induction.

(B and C) The graph shows the quantification of ER Ca<sup>2+</sup> storage capacity and SOCE Ca<sup>2+</sup> influx peak. Error bars denote s.e.m. for n = 8 cells pooled across 3 independent experiments.

Data are shown as the mean±SD, \*p<0.05 and \*\*p<0.01 by paired Student's t test compared to untreated AEC-IIs. The proteomics of exosomes comes from 2 independent experiments, and the polysome and western blot data come from 3 independent experiments.

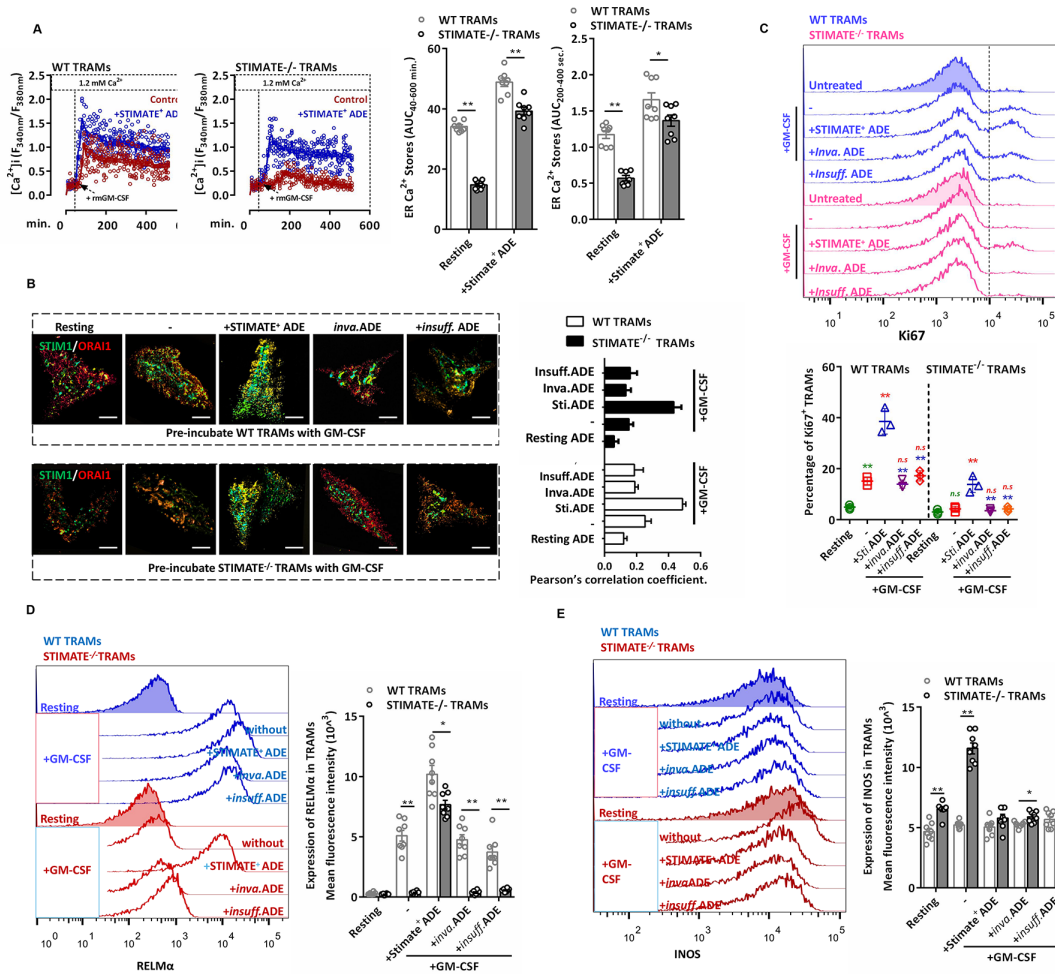

**Figure S9. Effects of STIMATE<sup>+</sup> ADE on GM-CSF-induced long-term Ca<sup>2+</sup> influx and CCE in TRAMs.**

(A) Representative images of Ca<sup>2+</sup> influx in WT or STIMATE<sup>-/-</sup> mouse TRAMs preincubated with STIMATE<sup>+</sup> ADE, *Inva.* ADE and *Instuff.* ADE before rmGM-CSF induction. The left figure shows the ratio of excitation wavelengths of Fura-2 AM at 340 nm and 380 nm. The right panel shows the quantification of ER Ca<sup>2+</sup> storage capacity and SOCE Ca<sup>2+</sup> influx peak. Error bars denote s.e.m. for n = 8 cells pooled across 3 independent experiments. Scale bar, 30 μm.

(B) Representative TIRF image of STIM1-GFP tag/ORAI1-mCherry tag cotransfected WT or STIMATE<sup>-/-</sup> mouse TRAMs stimulated with rmGM-CSF for 8 h after cocultivation with STIMATE<sup>+</sup> ADE, *Inva.* ADE and *Instuff.* ADE for 12 h, sequentially. The bar graph on the right shows the Pearson's correlation coefficient of the fused fluorescent spots. Scale bar, 2 μm.

(C) Flow cytometry analysis of the expression of the cell cycle entry checkpoint Ki67 in WT or STIMATE<sup>-/-</sup> mouse TRAMs induced by GM-CSF after cocultivation with STIMATE<sup>+</sup> ADE, *Inva.* ADE and *Instuff.* ADE for 12 h.

(D and E) Flow cytometry analysis of RELMα and INOS expression in WT or STIMATE<sup>-/-</sup> mouse TRAMs induced by GM-CSF after cocultivation with STIMATE<sup>+</sup> ADE, *Inva.* ADE and *Instuff.* ADE for 12 h.

Data are shown as the mean±SD, \*p < 0.05, and \*\*p < 0.01 by analysis of variance (ANOVA) followed by a post hoc test compared to resting TRAMs. All data were derived from 3 independent experiments.

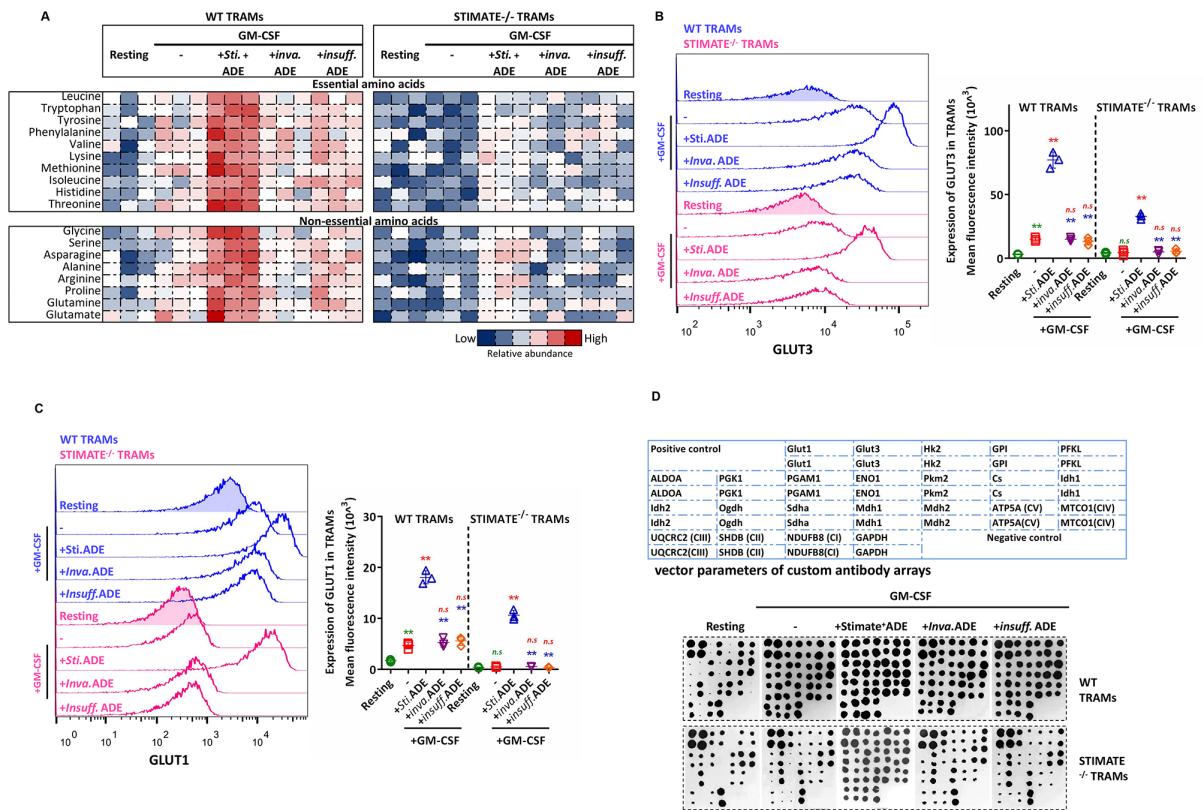

**Figure S10. STIMATE<sup>+</sup>ADE affects amino acid metabolism and glucose utilization in TRAMs**

(A) The abundance of polar metabolites of essential and nonessential amino acids in WT or STIMATE<sup>-/-</sup> mouse TRAMs induced by GM-CSF after cocultivation with STIMATE<sup>+</sup>ADE, *Inva.*ADE and *Insuff.*ADE for 12 h. Heatmap showing log normalized values from minimum (blue) to maximum (red).

(B and C) Flow cytometry analysis of the expression of the glucose transporters GLUT1 and GLUT3 in WT or STIMATE<sup>-/-</sup> mouse TRAMs induced by GM-CSF after cocultivation with STIMATE<sup>+</sup>ADE, *Inva.*ADE and *Insuff.*ADE for 12 h.

(D) The upper panel is mouse antibody pair List vector parameters of custom antibody arrays. The lower panel is the inverse phase image of the fluorescence luminescence of antibody arrays.

Data are shown as the mean $\pm$ SD, \* $p < 0.05$ , and \*\* $p < 0.01$  by analysis of variance (ANOVA) followed by a post hoc test compared to resting TRAMs. All data were derived from 3 independent experiments.

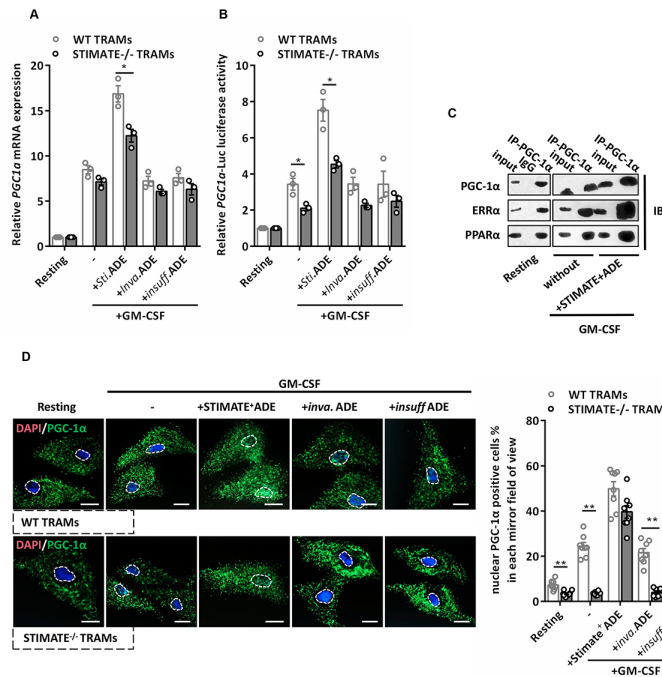

**Figure S11. Expression and activation of PGC-1 $\alpha$ .**

(A) PGC-1 $\alpha$  mRNA expression in WT or STIMATE<sup>-/-</sup> mouse TRAMs preincubated with STIMATE<sup>+</sup>-ADE, *Inva.*ADE and *Insuff.*ADE for 12 h before rmGM-CSF induction.

(B) Fluorescence intensity of the transfected PGC-1 $\alpha$ -luc luciferase reporter gene in WT or STIMATE<sup>-/-</sup> mouse TRAMs preincubated with STIMATE<sup>+</sup> ADE, *Inva.*ADE and *Insuff.*ADE for 12 h before rmGM-CSF induction.

(C) Representative images of coimmunoprecipitation analysis of the interaction of PGC-1 $\alpha$  with ERR $\alpha$  and PPAR $\alpha$  in WT or STIMATE<sup>-/-</sup> mouse TRAMs preincubated with STIMATE<sup>+</sup>-ADE for 12 h before rmGM-CSF induction.

(D) Representative immunofluorescence image of nuclear DAPI and PGC-1 $\alpha$  in WT or STIMATE<sup>-/-</sup> mouse TRAMs preincubated with STIMATE<sup>+</sup>-ADE, *Inva.*ADE and *Insuff.*ADE for 12 h before rmGM-CSF induction. The bar graph on the right depicts the quantification of the indicated number of cells. Scale bar, 10  $\mu$ m.



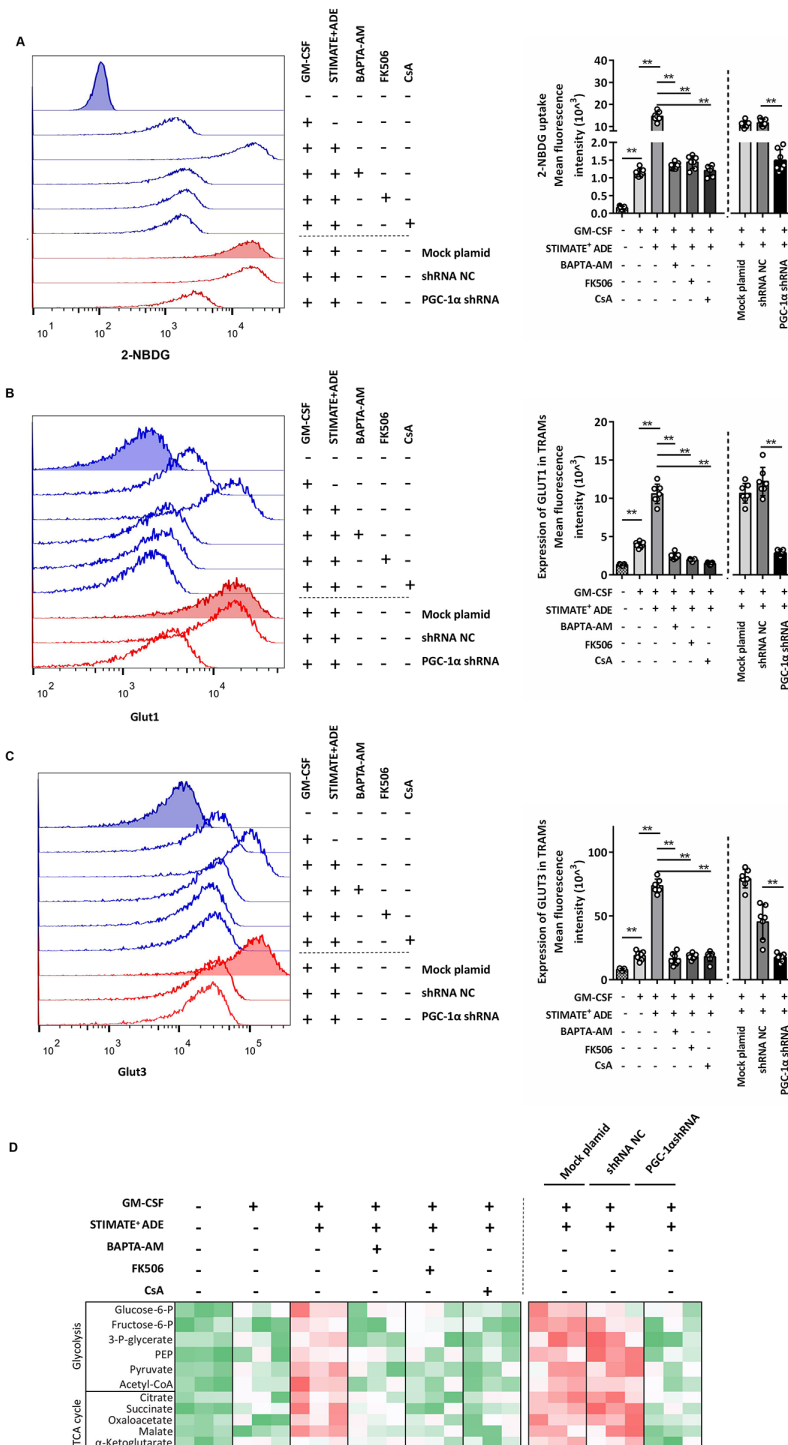

**Figure S12. Blockade of Ca<sup>2+</sup>-CaN-PGC-1 $\alpha$  signaling affects glucose utilization of TRAMs**

(A) Flow cytometry analysis of the fluorescence intensity of glucose mimetic 2-NBDG uptake in WT or STIMATE<sup>-/-</sup> mouse TRAMs induced by GM-CSF after cocultivation with STIMATE<sup>+</sup>ADE, BAPTA-AM (1.5  $\mu$ M), FK506 (100  $\mu$ g/L), CsA (7 nM) and PGC-1 $\alpha$  shRNA (2  $\mu$ g).

(B-C) Flow cytometry analysis of the fluorescence intensity of the glucose transporters GLUT1 and GLUT3 in WT or STIMATE<sup>-/-</sup> mouse TRAMs induced by GM-CSF after cocultivation with STIMATE<sup>+</sup>ADE, BAPTA-AM (1.5  $\mu$ M), FK506 (100  $\mu$ g/L), CsA (7 nM) and PGC-1 $\alpha$  shRNA (2  $\mu$ g).



Data are shown as the mean±SD, \*p < 0.05, and \*\*p < 0.01 by analysis of variance (ANOVA) followed by a post hoc test compared to resting TRAMs. All data were derived from 3 independent experiments.

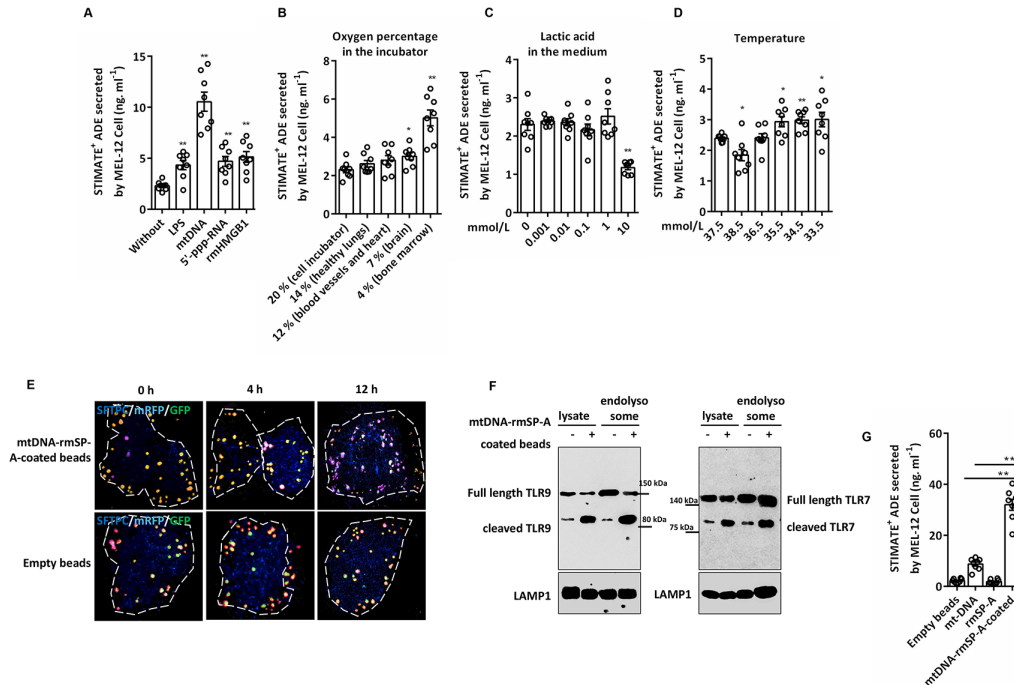

**Figure S14. Production of therapeutic STIMATE<sup>+</sup> ADE.**

(A) Exo-based ELISA to detect the concentration of STIMATE<sup>+</sup> ADE released by MEL-12 cells stimulated with LPS and rmHMGB1 or transfected with mtDNA and 5'-pppRNA.

(B) ELISA to detect the concentration of STIMATE<sup>+</sup> ADE released by MEL-12 cells at different oxygen levels, referring to the oxygen content of human tissue.

(C) The concentration of STIMATE<sup>+</sup> ADE released by MEL-12 cells in lactic acid-supplemented medium at the indicated concentrations.

(D) The concentration of STIMATE<sup>+</sup> ADE released by MEL-12 cells at the specified ambient temperature.

(E) Fluorescence images of mtDNA-rmSP-A-coated beads at 4 h and 12 h after being ingested by MLE-12. The basic mCherry-GFP beads show yellow fluorescence outside the cell or in endosomes. When endolysosomes are formed, acid-sensitive GFP fluorescence is quenched, while mCherry is unaffected, resulting in red fluorescence of the beads.

(F) Lysates or phagosome preparations from ingested mtDNA-rmSP-A-coated beads 4 h and 12 h MLE-12 cells fed latex beads were separated by SDS-PAGE and probed with antibodies specific for the indicated proteins. Full-length TLR9/TLR7 and the truncated protein (cleaved TLR9/TLR7) are indicated.

(G) exosomes-based ELISA detected the levels of STIMATE<sup>+</sup> ADE released by MLE12 cells induced by mtDNA-rmSP-A-coated beads. Empty bait and mtDNA transfection served as a control group.

Data are shown as the mean±SD, \*p < 0.05, and \*\*p < 0.01 by analysis of variance (ANOVA) followed by a post hoc test compared to resting TRAMs. All data were derived from 3 independent experiments.

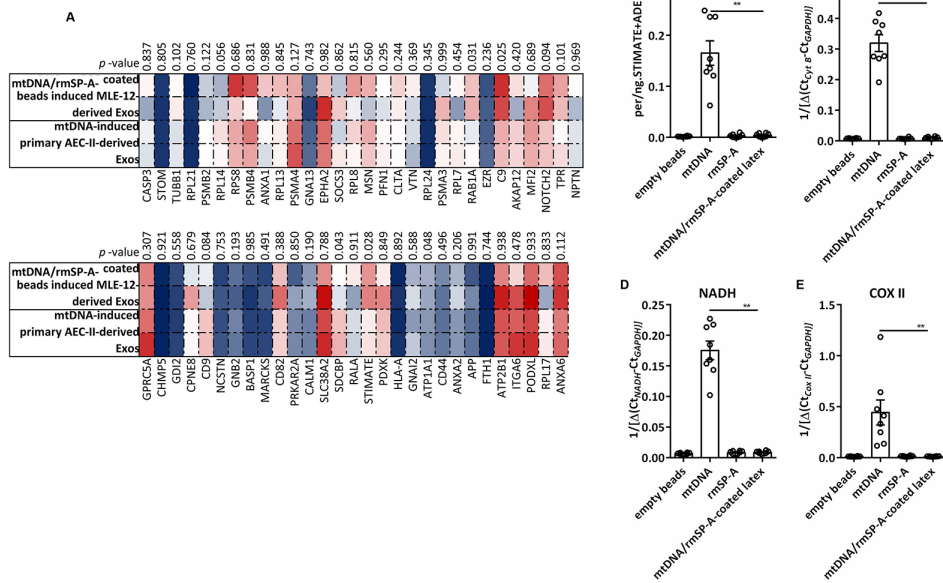

**Figure S15. Quality Control of mtDNA/rmSP-A-coated beads induced MLE-12-derived STIMATE<sup>+</sup>ADE**

(A) Comparison of overlapping differential protein cargoes in mtDNA/rmSP-A-coated beads induced MLE-12-derived STIMATE<sup>+</sup>ADE and mtDNA transfection induced primary AEC-II-derived STIMATE<sup>+</sup>ADE.

(B-D) The levels of free NFP and mtDNA Cyt B, NADH and COX II in therapeutic mtDNA/rmSP-A-coated beads induced by MLE-12-derived STIMATE<sup>+</sup>ADE were detected by ELISA and qPCR.

Data are shown as the mean±SD, \*p < 0.05, and \*\*p < 0.01 by analysis of variance (ANOVA) followed by a post hoc test compared to resting TRAMs. All data were derived from 3 independent experiments.

### Supplementary Table.

**Table 1. Characteristics of the ALI/ARDS patients**

|               | ALI/ARDS    |
|---------------|-------------|
| n             | <b>112</b>  |
| Age (yr)      | 51.5 ± 7.3  |
| Male (%)      | 47.3        |
| APACHE III    | 69.1 ± 20.2 |
| Infection (%) | 72(64.3%)   |
| Sepsis (%)    | 47(42%)     |
| Trauma (%)    | 40(35.7%)   |
| Shock (%)     | 27(24.1%)   |

Values are means ± SD

APACHE III: Acute physiology and chronic health evaluation III

**Table 2. Characteristics of the IFP patients**

|                                                           |             |
|-----------------------------------------------------------|-------------|
|                                                           | PF          |
| n                                                         | 44          |
| Age (yr)                                                  | 68.5 ± 7.2  |
| Male (%)                                                  | 88.6        |
| Smoking (%)                                               | 72.7        |
| IPF (%)                                                   | 6.8         |
| SSc-ILD (%)                                               | 18.2        |
| RA-ILD (%)                                                | 6.8         |
| Sarcoidosis, fibrotic (stage IV) (%)                      | 34.1        |
| Chronic fibrotic hypersensitivity pneumonitis (%)         | 2.3         |
| Unclassifiable fibrotic ILD (%)                           | 31.8        |
| FVC (% of predicted value)                                | 66.8 ± 8.2  |
| FEV <sub>1</sub> :FVC                                     | 0.83 ± 0.02 |
| Carbon monoxide diffusing capacity (% of predicted value) | 41.7 ± 9.3  |
| Distance of 6 min test (m)                                | 385 ± 72.6  |
| Use of Supplemental oxygen (%)                            | 27.3        |
| Time since diagnosis (yr)                                 | 2.4 ± 1.7   |

Values are means ± SD

IPF: idiopathic pulmonary fibrosis

SSc: systemic sclerosis

RA: Rheumatoid arthritis

ILD: interstitial lung disease

FEV<sub>1</sub>/FVC: Denotes forced expiratory volume in one second

FVC: Forced vital capacity

Denotes forced expiratory volume in one second

**Table 3. Information of antibody.**

| Product #  | Name  | Species<br>Reactivity | Host                 | Conjugate             | Manufacturer |
|------------|-------|-----------------------|----------------------|-----------------------|--------------|
| MHCD4522   | CD45  | Human                 | Mouse/IgG1           | PE-Alexa<br>Fluor 610 | Invitrogen   |
| 15-0118-42 | CD11B | Human                 | Mouse/IgG1,<br>kappa | PE-Cyanine5           | eBioscience  |
| 78-0116-42 | CD11C | Human                 | Mouse/IgG1,<br>kappa | Super Bright<br>780   | eBioscience  |
| 48-0649-42 | CD64  | Human                 | Mouse/IgG1,<br>kappa | eFluor 450            | eBioscience  |
| 61-0451-82 | CD45  | Mouse                 | Rat/IgG2b,<br>kappa  | PE-Alexa<br>Fluor 610 | eBioscience  |
| 15-0112-82 | CD11B | Mouse                 | Rat/IgG2b,<br>kappa  | PE-Cyanine5           | eBioscience  |

|                     |                |               |                   |                  |             |
|---------------------|----------------|---------------|-------------------|------------------|-------------|
| 78-0114-82          | CD11C          | Mouse         | Armenian hamster  | Super Bright 780 | eBioscience |
| 12-0641-82          | CD64           | Mouse         | Mouse/IgG1, kappa | PE               | eBioscience |
| A19635              | IL-1 $\beta$   | Mouse         | Rabbit            | UnConjugate      | abclonal    |
| A3774               | iNOS           | Mouse         | Rabbit            | UnConjugate      | abclonal    |
| A12255              | IL-10          | Mouse         | Rabbit            | UnConjugate      | abclonal    |
| A0694               | SOCS3          | Mouse         | Rabbit            | UnConjugate      | abclonal    |
| A18692              | TGF- $\beta$   | Mouse         | Rabbit            | UnConjugate      | abclonal    |
| PA5-44449&PA5-70169 | STIMATE        | Human, Mouse  | Rabbit            | UnConjugate      | Invitrogen  |
| A5789               | CD63           | Mouse         | Rabbit            | UnConjugate      | abclonal    |
| A4326               | TSG101         | Mouse         | Rabbit            | UnConjugate      | abclonal    |
| A2582               | ERP72          | Mouse         | Rabbit            | UnConjugate      | abclonal    |
| AC038               | LAMP1          | Mouse         | Rabbit            | UnConjugate      | abclonal    |
| A15788              | Sec61 $\beta$  | Human, Mouse  | Rabbit            | UnConjugate      | abclonal    |
| A9764               | STIM1          | Mouse         | Rabbit            | UnConjugate      | abclonal    |
| A19278              | Na+K+ATPase    | Mouse         | Rabbit            | UnConjugate      | abclonal    |
| A7412               | ORAI1          | Mouse         | Rabbit            | UnConjugate      | abclonal    |
| A1934               | Rab27a         | Human & Mouse | Rabbit            | UnConjugate      | abclonal    |
| A2094               | Ki67           | Human & Mouse | Rabbit            | UnConjugate      | abclonal    |
| A11727              | GLUT1          | Human & Mouse | Rabbit            | UnConjugate      | abclonal    |
| A4137               | GLUT3          | Human & Mouse | Rabbit            | UnConjugate      | abclonal    |
| A12348              | PGC-1 $\alpha$ | Human & Mouse | Rabbit            | UnConjugate      | abclonal    |
| A3252               | NRF-1          | Human & Mouse | Rabbit            | UnConjugate      | abclonal    |

|              |                                                |               |        |             |                           |
|--------------|------------------------------------------------|---------------|--------|-------------|---------------------------|
| A4176        | ERR $\alpha$                                   | Human & Mouse | Rabbit | UnConjugate | abclonal                  |
| A6697        | PPAR $\alpha$                                  | Human & Mouse | Rabbit | UnConjugate | abclonal                  |
| ab110413     | Total OXPHOS Rodent WB Cocktail                | Human & Mouse | Rabbit | UnConjugate | abcam                     |
| A19065       | GAPDH                                          | Human & Mouse | Rabbit | UnConjugate | abclonal                  |
| Cat# A-21245 | Alexa647-conjugated anti-rabbit-IgG            |               |        | Alexa647    | Molecular Probes          |
| Cat# A-21422 | Alexa555-conjugated anti-mouse-IgG             |               |        | Alexa555    | Molecular Probes          |
| AE012        | Mouse anti GFP-Tag mAb                         |               |        | UnConjugate | abclonal                  |
| #4283        | MyD88                                          | Mouse         | Rabbit | UnConjugate | Cell Signaling Technology |
| #74792       | Mitochondrial Dynamics Antibody Sampler Kit II | Mouse         | Rabbit | UnConjugate | Cell Signaling Technology |

#### Supplementary Table 4. Sequence of oligonucleotides

##### sgRNA oligonucleotides:

mouse STIMATE guide 1: 3'-GAGGGCGCACTGTCCTACCC-5'  
mouse STIMATE guide 2: 3'-GGTACGTACCATATCCTCCA-5'  
mouse RAB27A guide 1: 3'-CCAAGGCCAAGAAGCTTGATG-5'  
mouse RAB27A guide 2: 3'-CACAGTGGGCATTGATTCA-5'

##### shRNA oligonucleotides:

mouse PGC-1 $\alpha$  shRNA-1 3'-GCTCCATCCTTTGGCCATTATC-5'  
mouse PGC-1 $\alpha$  shRNA-2 3'-GCAGATGCCGGGAAAGAAAGA-5'  
mouse PGC-1 $\alpha$  shRNA-NC-1 3'-GCCTCTTCCACTGTGTATACCT-5'  
mouse PGC-1 $\alpha$  shRNA-NC-2 3'-GACGAGGCCTAGAGAGAGAAA-5'

##### Primer oligonucleotides

|                                      |                                                                   |
|--------------------------------------|-------------------------------------------------------------------|
| mouse PGC-1 $\alpha$                 | Forward: GGAGGCGAGAACATCAAGCC<br>Reverse: CGGCCTTCCCTCGTAGTGA     |
| mouse GAPDH                          | Forward: TTGATGGCAACAATCTCCAC<br>Reverse: CGTCCCGTAGACAAAATGGT    |
| <b>mtDNA Primer oligonucleotides</b> |                                                                   |
| mouse mtDNA region 1                 | Forward: TGAACGGCTAAACGAGGGTC<br>Reverse: AGCTCCATAGGGTCTTCTCGT   |
| mouse mtDNA region 2                 | Forward: CAGTCCCCTCCCTAGGACTT<br>Reverse: ACCCTGGTCGGTTTGATGTT    |
| mouse mtDNA region 3                 | Forward: TAATCGCACATGGCCTCACA<br>Reverse: GAAGTCCTCGGGCCATGATT    |
| mouse gDNA B2m                       | Forward: AGCAAAGAGGCCTAATTGAAGTC<br>Reverse: GAAGTAGCCACAGGGTTGGG |
| mouse gDNA Tuba1a                    | Forward: TGAGGAGGTTGGTGTGGATTC<br>Reverse: TGAGGAGGTTGGTGTGGATTC  |

**Supplementary Table 5. The overlap of differences proteomics in exosome induced by DAPM & PAMP**

|         |                                                                     |
|---------|---------------------------------------------------------------------|
| GPRC5A  | G protein-coupled receptor class C group 5 member A                 |
| CHMP5   | Charged multivesicular body protein 5                               |
| GDI2    | Rab GDP dissociation inhibitor beta                                 |
| CPNE8   | Copine-8                                                            |
| CD9     | CD9 antigen                                                         |
| NCSTN   | Nicastrin                                                           |
| GNB2    | Guanine nucleotide-binding protein G(I)/G(S)/G(T) subunit beta-2    |
| BASP1   | Brain acid soluble protein 1                                        |
| MARCKS  | Myristoylated alanine-rich C-kinase substrate                       |
| CD82    | CD82 antigen                                                        |
| PRKAR2A | cAMP-dependent protein kinase type II-alpha regulatory subunit      |
| CALM1   | Calmodulin 1                                                        |
| SLC38A2 | Sodium-coupled neutral amino acid transporter 2                     |
| SDCBP   | Syndecan binding protein                                            |
| RALA    | Ras-related protein Ral-A                                           |
| STIMATE | STIM activating enhancer                                            |
| PDXK    | Pyridoxal kinase                                                    |
| HLA-A   | HLA class I histocompatibility antigen, A-33 alpha chain            |
| GNAI2   | Guanine nucleotide-binding protein G(i) subunit alpha-2             |
| ATP1A1  | ATPase Na <sup>+</sup> /K <sup>+</sup> transporting subunit alpha 1 |
| CD44    | CD44 antigen                                                        |
| ANXA2   | Isoform 2 of Annexin A2                                             |
| APP     | Amyloid beta A4 protein                                             |
| FTH1    | Ferritin heavy chain                                                |
| ATP2B1  | Plasma membrane calcium-transporting ATPase 1                       |



|        |                                                                         |
|--------|-------------------------------------------------------------------------|
| ITGA6  | Integrin alpha-6                                                        |
| PODXL  | Podocalyxin                                                             |
| RPL17  | Isoform 3 of 60S ribosomal protein L17                                  |
| ANXA6  | Annexin A6                                                              |
| CASP3  | Caspase 3                                                               |
| STOM   | Erythrocyte band 7 integral membrane protein                            |
| TUBB1  | Tubulin beta-1 chain                                                    |
| RPL21  | 60S ribosomal protein L21                                               |
| PSMB2  | Proteasome subunit beta type-2                                          |
| RPL14  | 60S ribosomal protein L14                                               |
| RPS8   | 40S ribosomal protein S8                                                |
| PSMB4  | Proteasome subunit beta type-4                                          |
| ANXA1  | Annexin A1                                                              |
| RPL13  | 60S ribosomal protein L13                                               |
| PSMA4  | Proteasome subunit alpha type-4;                                        |
| GNA13  | Guanine nucleotide-binding protein subunit alpha-13                     |
| EPHA2  | Ephrin type-A receptor 2                                                |
| SOCS3  | Suppressor of cytokine signaling 3                                      |
| RPL8   | 60S ribosomal protein L8                                                |
| MSN    | Moesin                                                                  |
| PFN1   | Profilin-1                                                              |
| CLTA   | Clathrin light chain A                                                  |
| VTN    | Vitronectin                                                             |
| RPL24  | 60S ribosomal protein L24                                               |
| PSMA3  | Proteasome subunit alpha type-3                                         |
| RPL7   | 60S ribosomal protein L7                                                |
| RAB1A  | Ras-related protein Rab-1A                                              |
| EZR    | Ezrin                                                                   |
| C9     | Complement component C9                                                 |
| AKAP12 | A-kinase anchor protein 12                                              |
| MFI2   | Melanotransferrin                                                       |
| NOTCH2 | Neurogenic locus notch homolog protein 2                                |
| TPR    | Nucleoprotein TPR                                                       |
| NPTN   | Neuroplastin                                                            |
| PPP2CA | Serine/threonine-protein phosphatase 2A catalytic subunit alpha isoform |
| RPS4Y1 | 40S ribosomal protein S4, Y isoform 1                                   |
| ITGB4  | Integrin beta-4                                                         |
| NCL    | Nucleolin                                                               |
| HNRNPK | Isoform 2 of Heterogeneous nuclear ribonucleoprotein K                  |
| CLSTN1 | Calsyntenin-1                                                           |
| EEF2   | Elongation factor 2                                                     |
| TUBB4B | Tubulin beta-4B chain                                                   |
| TRIM28 | Transcription intermediary factor 1-beta                                |

|          |                                                                 |
|----------|-----------------------------------------------------------------|
| HNRNPA3  | Heterogeneous nuclear ribonucleoprotein A3                      |
| HSP90AB1 | Heat shock protein HSP 90-beta                                  |
| PRMT1    | Protein arginine N-methyltransferase 1                          |
| ACTB     | Actin, cytoplasmic 1                                            |
| GNB2L1   | Guanine nucleotide-binding protein subunit beta-2-like 1        |
| ARPC2    | Actin-related protein 2/3 complex subunit 2                     |
| KIF5B    | Kinesin family member 5B                                        |
| PRPF19   | Pre-mRNA-processing factor 19                                   |
| HNRNPA1  | Heterogeneous nuclear ribonucleoprotein A1                      |
| SEPT2    | Isoform 2 of Septin-2                                           |
| THBS1    | Thrombospondin-1                                                |
| LAMA5    | Laminin subunit alpha-5                                         |
| FBN1     | Fibrillin-1                                                     |
| SPOCK1   | SPARC (osteonectin), cwcv and kazal like domains proteoglycan 1 |
